# Supplementary material
Source: Springer Nature journal article supplement (https://www.springermedizin.de/resource/supplementary/12881_2012_1105_MOESM4_ESM.pdf/9451980)

**A**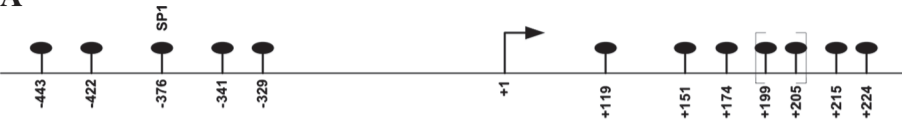**B**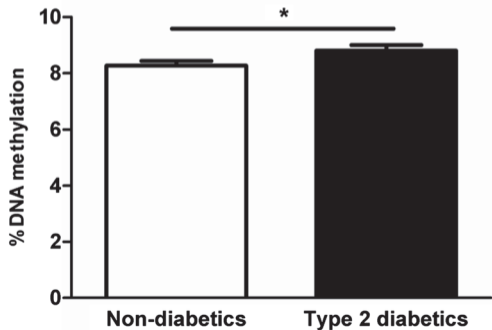

Supplement: MOESM4 [file 9451980]
